# Supplementary material for: Influence of the Phytosanitary Status, Cultivar, and Harvest Time on the Phenolic, Chlorophyll, and Alkaloid Content of Rosa sp. Leaves
Source: MDPI journal article supplement (doi:10.3390/horticulturae9111169), 2023-10-26
Supplement: s1 [file s1]

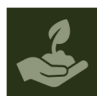

# Influence of the phytosanitary status, cultivar, and harvest time on the phenolic, chlorophyll, and alkaloid content of *Rosa hybrida* L. leaves

Adelina Larisa Munteanu <sup>1</sup>, Loredana Elena Vijan <sup>2,\*</sup>, Carmen Mihaela Topală <sup>2</sup>, and Rodi Mitrea <sup>1,3</sup>

<sup>1</sup> Doctoral School of Plant and Animal Resources Engineering, University of Craiova, 13 A.I. Cuza Street, RO 200585, Craiova, Romania; adelinamunteanu94@yahoo.com

<sup>2</sup> Faculty of Sciences, Physical Education and Computer Science, University of Pitesti, 1 Targu din Vale Street, Pitesti, RO 110040, Romania; loredana.vijan@upit.ro

<sup>3</sup> Department of Horticulture and Food Science, Faculty of Horticulture, University of Craiova, 13 A.I. Cuza Street, RO 200585, Craiova, Romania; rodi.mitrea@edu.ucv.ro

\* Correspondence: loredana.vijan@upit.ro; vloredana2005@yahoo.com

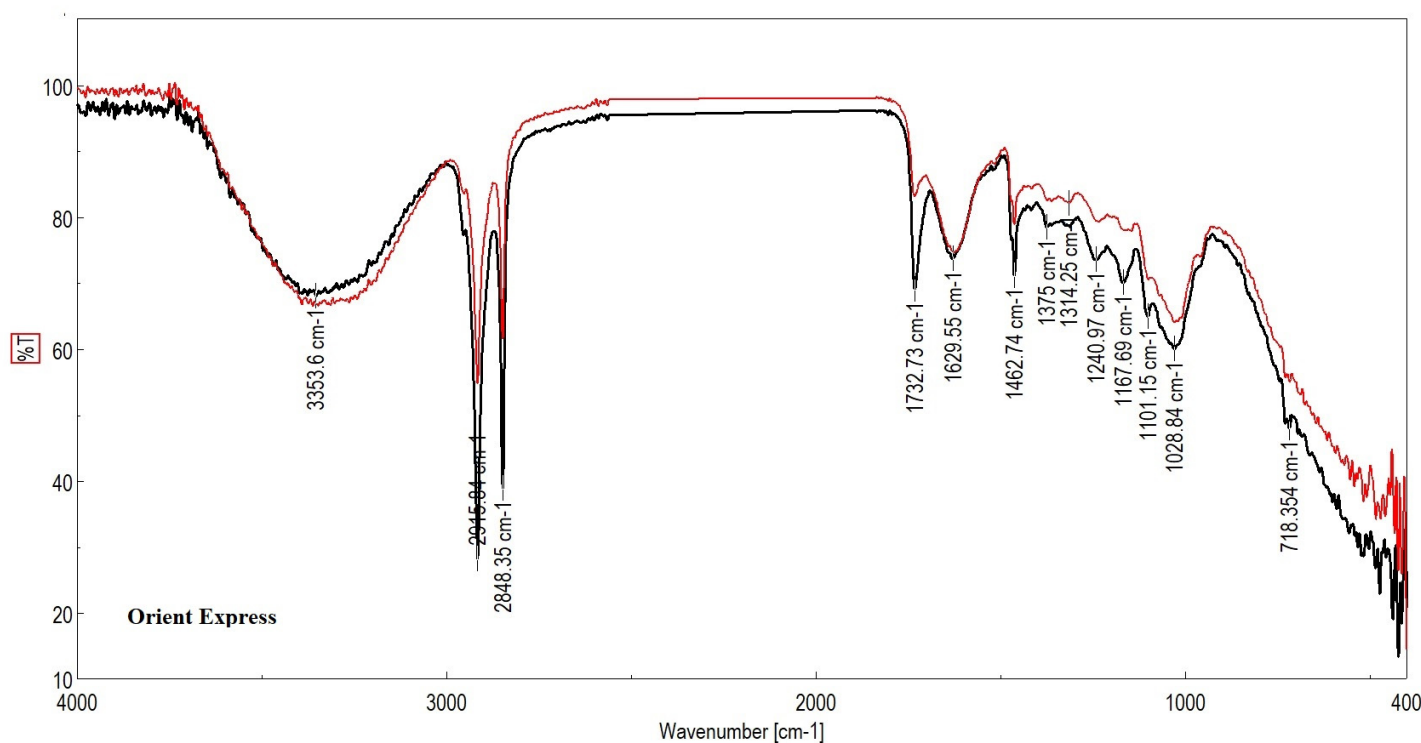

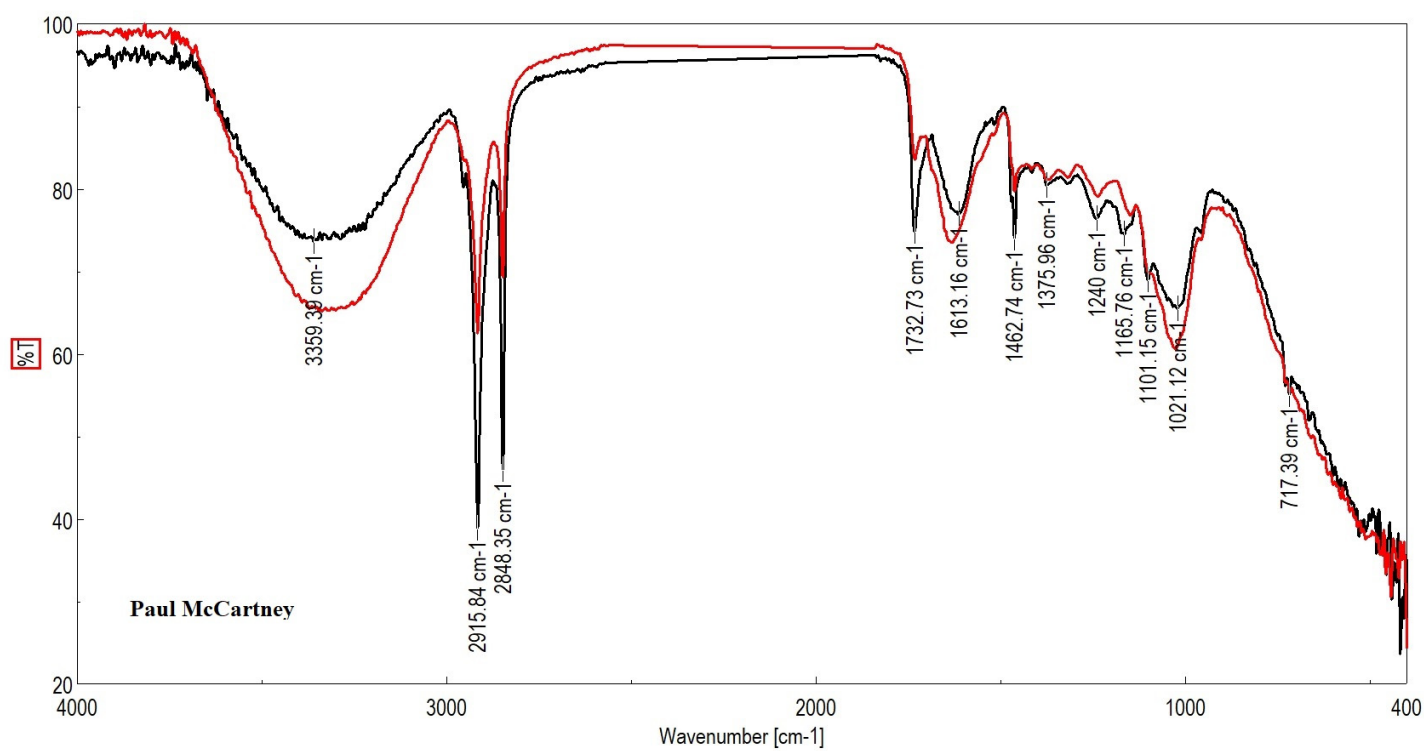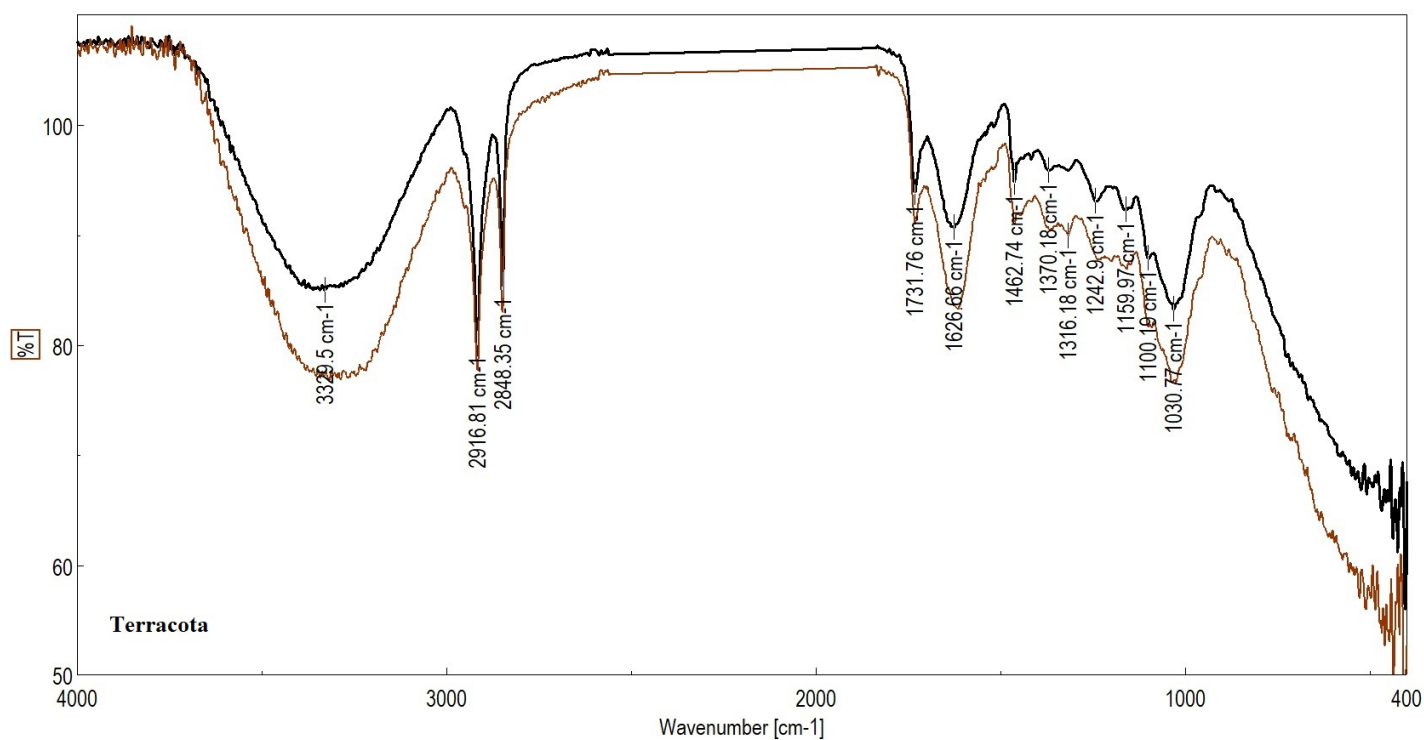

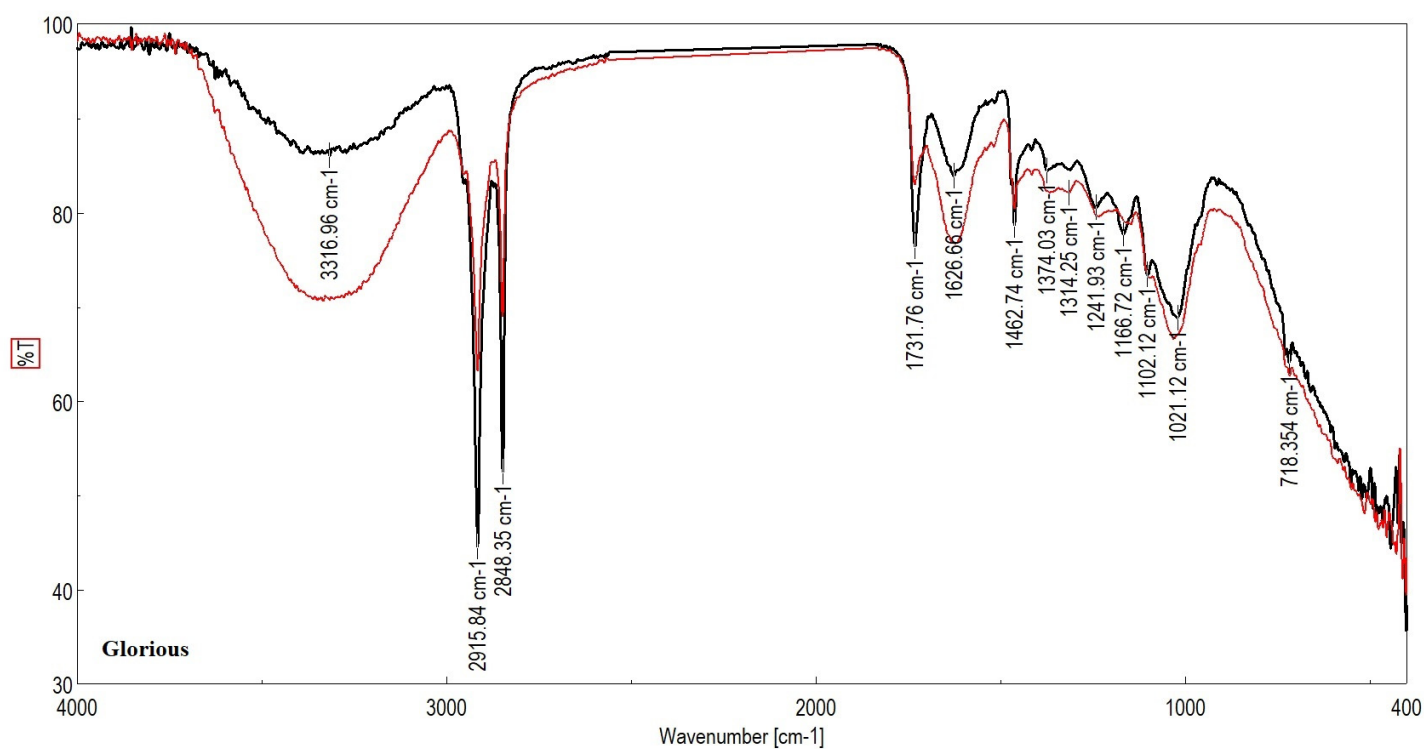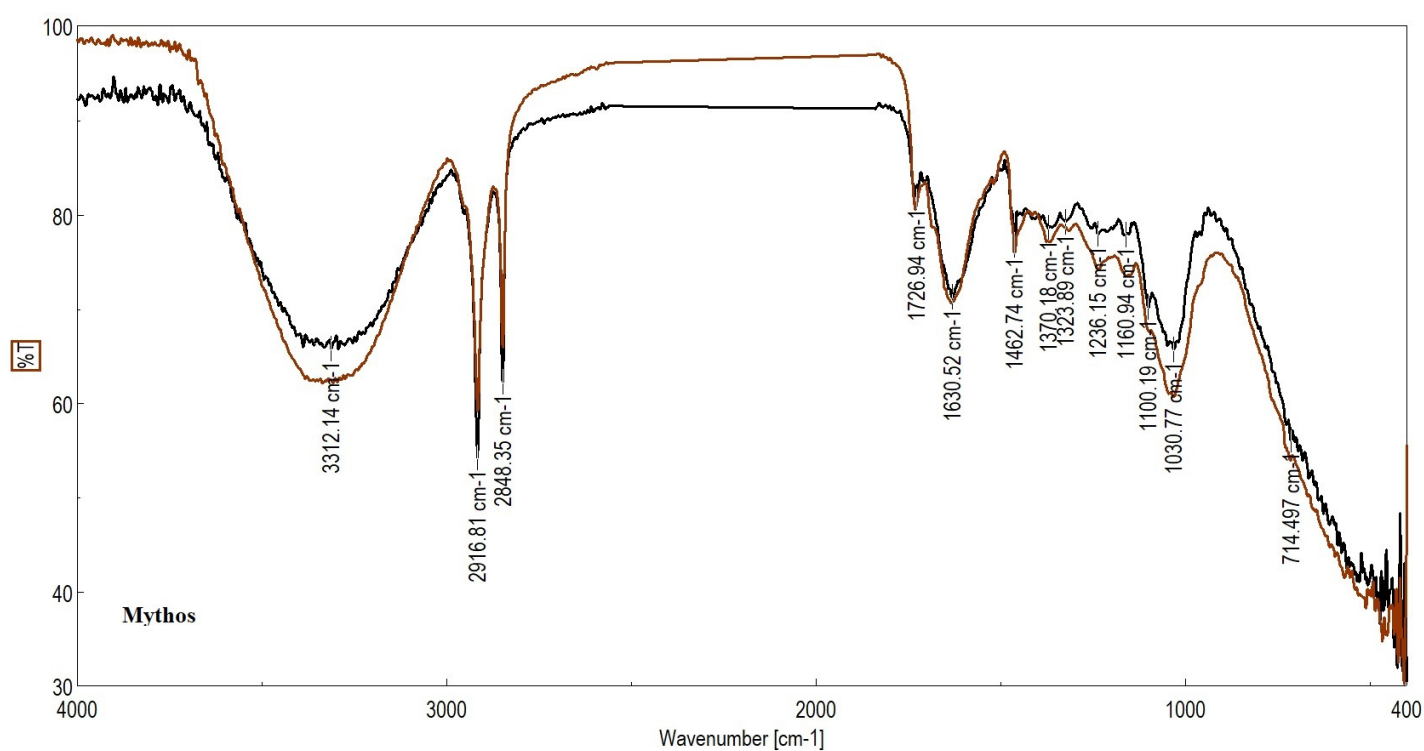

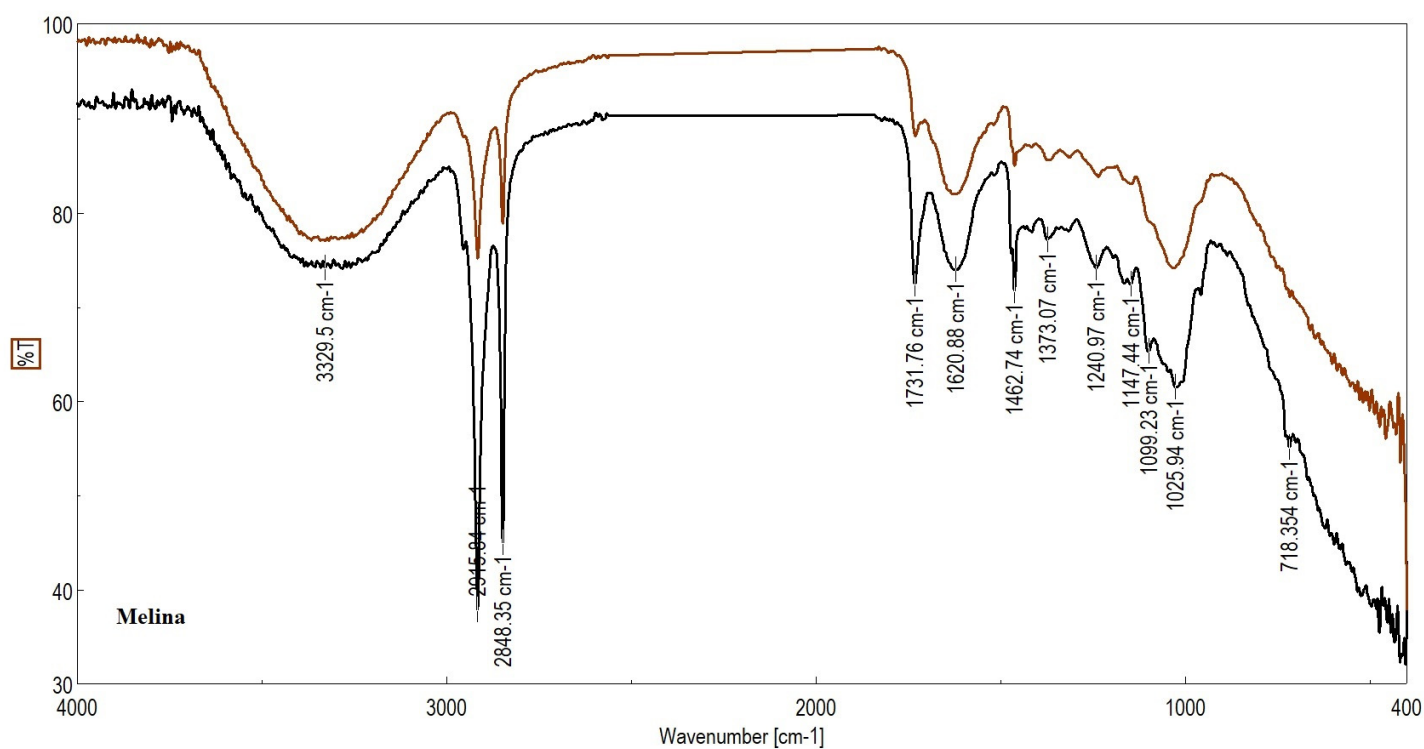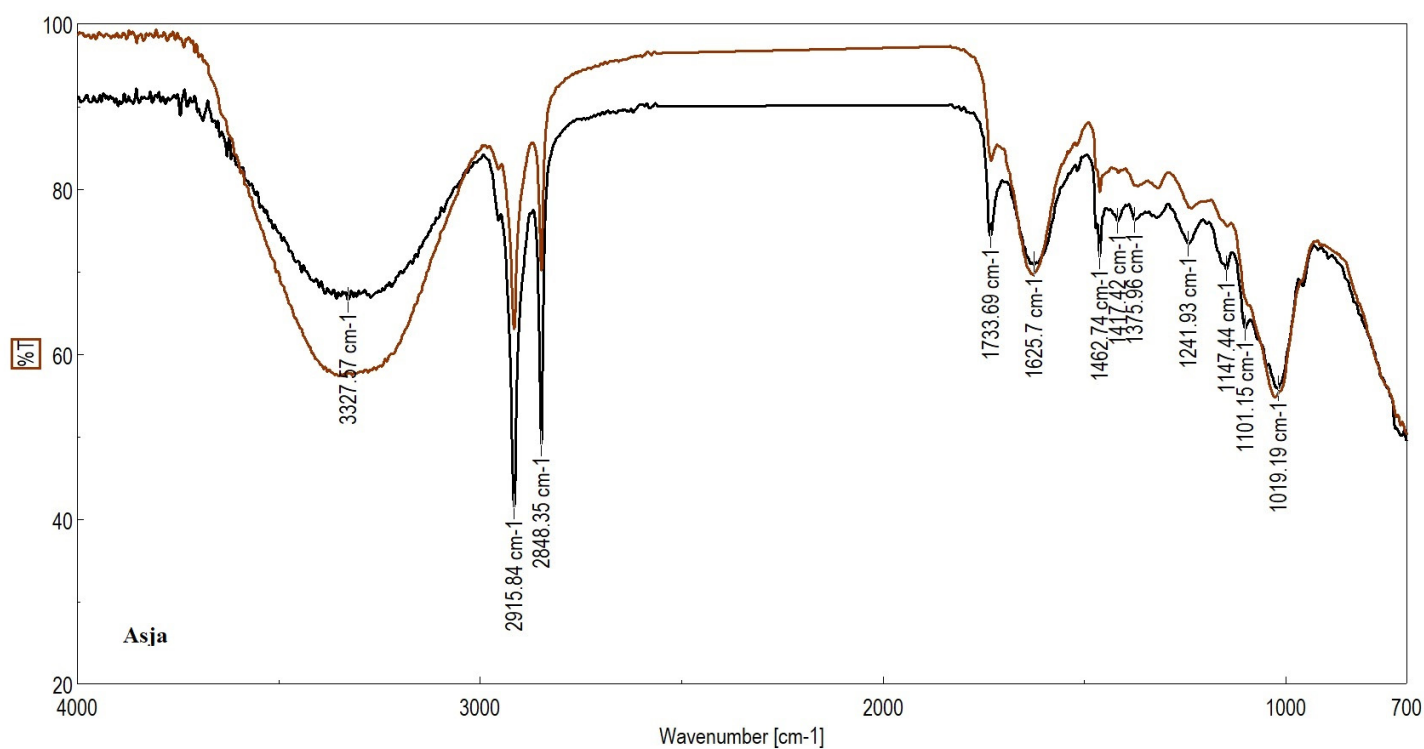

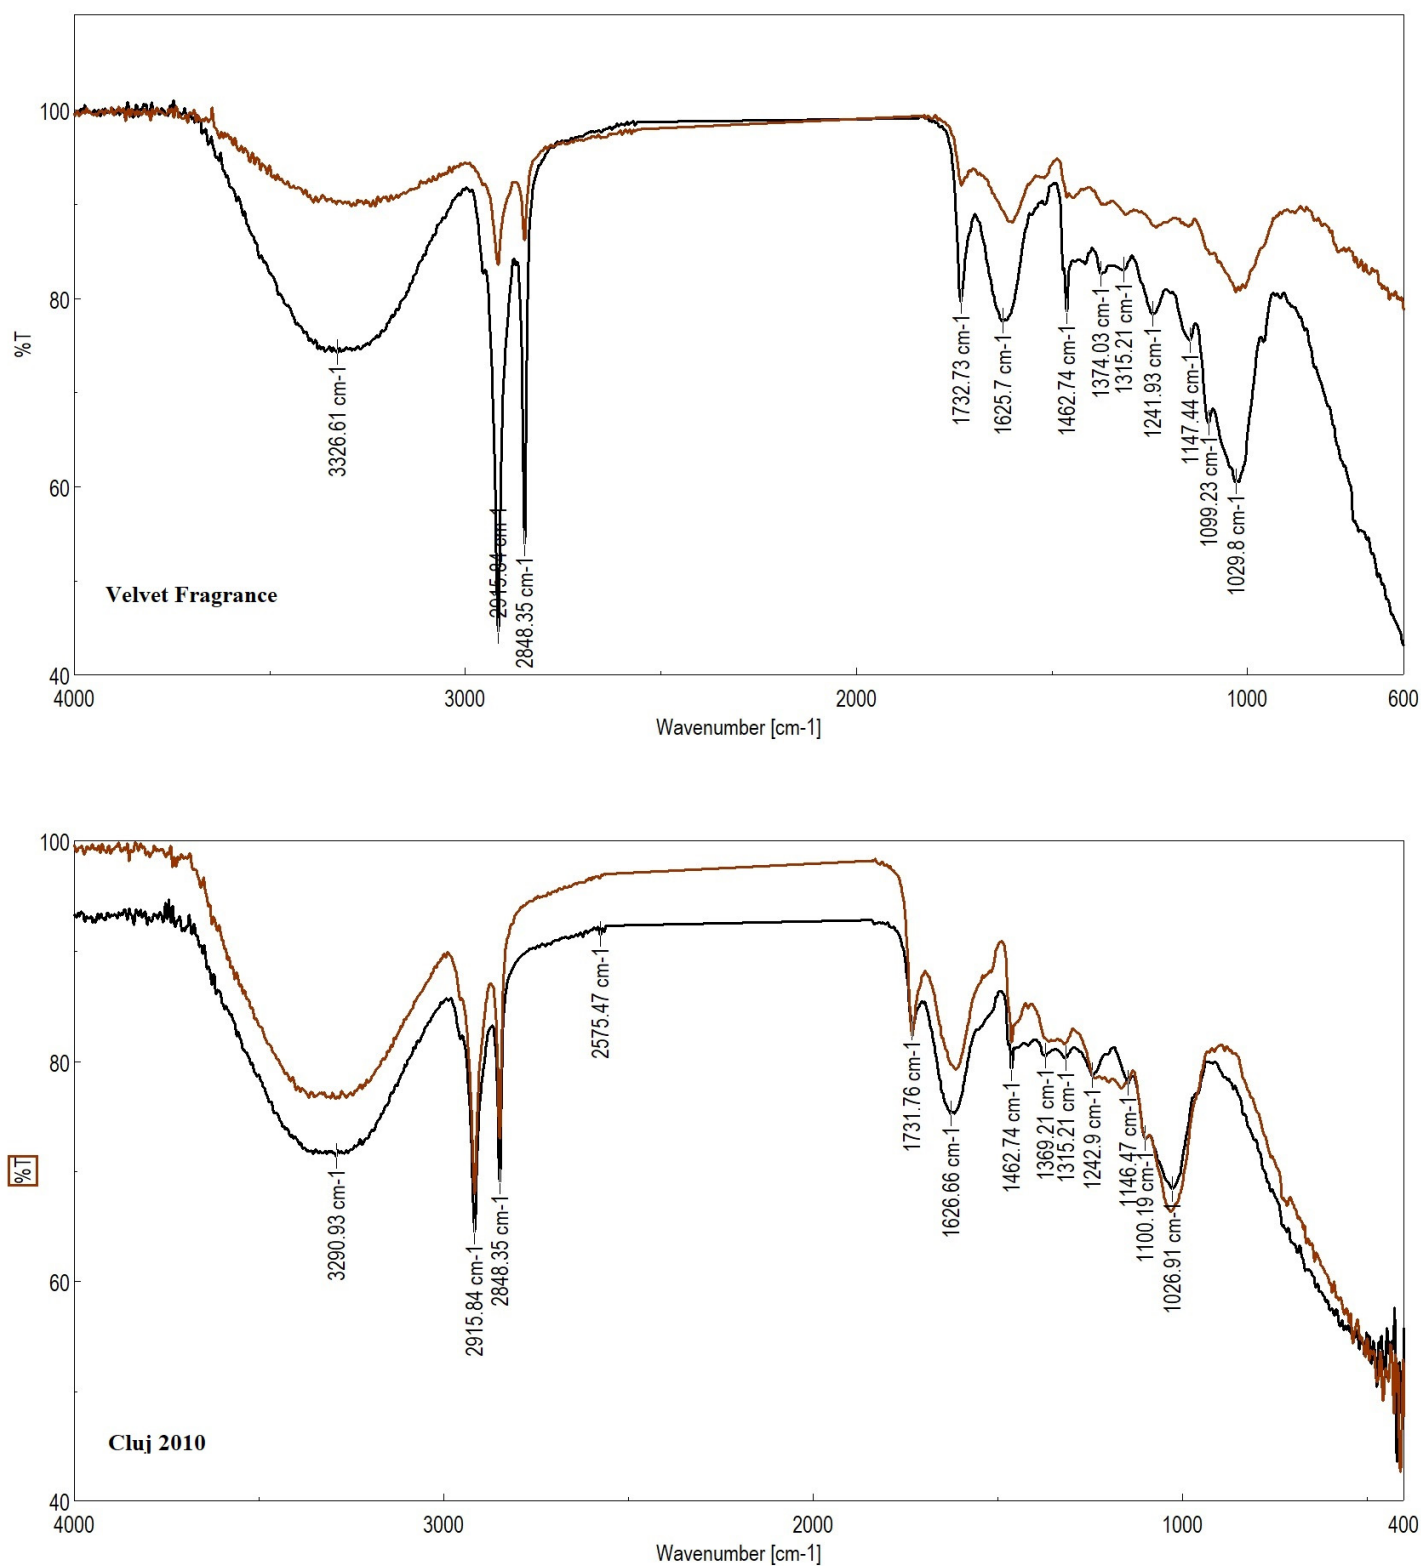

**Figure S1.** ATR-FTIR spectra of healthy and affected rose leaves, for 'Orient Express', 'Paul McCartney', 'Terracotta', 'Glorious', 'Mythos', 'Melina', 'Asja', 'Velvet Fragrance', and 'Cluj 2010' cultivars.
